# Supplementary material for: Photocatalytic activity of layered MoS2 in the reductive degradation of bromophenol blue
Source: Royal Society of Chemistry journal article supplement (doi:10.1039/d2ra03362c), 2022-01-01
Supplement: d2ra03362c1.pdf [file d2ra03362c1.pdf]

**Photocatalytic activity of 2D-MoS<sub>2</sub> in the reductive degradation of bromophenol blue.**

**SUPPLEMENTARY**

Table S1. Qualitative and quantitative analysis of 2D-MoS<sub>2</sub>

|                                                                                                                                    | BE (eV) | At. Conc. (%) | Assignments                                                                                                             |
|------------------------------------------------------------------------------------------------------------------------------------|---------|---------------|-------------------------------------------------------------------------------------------------------------------------|
| S 2p <sub>3/2</sub>                                                                                                                | 162.6   | 2.08          | MoS <sub>2</sub>                                                                                                        |
| S 2p <sub>1/2</sub>                                                                                                                | 164.0   | 1.04          |                                                                                                                         |
| S 2p <sub>3/2</sub>                                                                                                                | 169.2   | 5.37          | SO <sub>4</sub> <sup>2-</sup>                                                                                           |
| S 2p <sub>1/2</sub>                                                                                                                | 170.4   | 2.69          |                                                                                                                         |
| Mo 3d <sub>5/2</sub>                                                                                                               | 229.6   | 0.92          | MoS <sub>2</sub>                                                                                                        |
| Mo 3d <sub>3/2</sub>                                                                                                               | 232.7   | 0.61          |                                                                                                                         |
| Mo 3d <sub>5/2</sub>                                                                                                               | 233.7   | 2.21          | Mainly Mo(SO <sub>4</sub> ) <sub>3</sub> ; MoO <sub>3</sub> (residual);<br>Mo(CO <sub>3</sub> ) <sub>3</sub> (residual) |
| Mo 3d <sub>3/2</sub>                                                                                                               | 236.8   | 1.47          |                                                                                                                         |
| C 1s                                                                                                                               | 284.7   | 21.53         | sp <sup>2</sup> (and sp <sup>3</sup> at 285 eV)                                                                         |
|                                                                                                                                    | 286.2   | 10.06         | C-N and C-O-C (or C-O)                                                                                                  |
|                                                                                                                                    | 288.6   | 2.43          | CO <sub>3</sub> <sup>2-</sup>                                                                                           |
|                                                                                                                                    | 291.1   | 1.57          | π-π*                                                                                                                    |
| O 1s                                                                                                                               | 528.8   | 0.71          | MoO <sub>3</sub>                                                                                                        |
|                                                                                                                                    | 532.1   | 34.11         | SO <sub>4</sub> <sup>2-</sup> (and O=C, residual)                                                                       |
|                                                                                                                                    | 533.9   | 5.71          | O-C                                                                                                                     |
|                                                                                                                                    | 537.5   | 1.69          | H <sub>2</sub> O                                                                                                        |
| Na 1s                                                                                                                              | 1071.8  | 2.65          | Na <sup>+</sup>                                                                                                         |
| S 2s                                                                                                                               | 226.7   | —             | MoS <sub>2</sub>                                                                                                        |
|                                                                                                                                    | 233.2   | —             | SO <sub>4</sub> <sup>2-</sup>                                                                                           |
| N 1s<br>(overlapping Mo 3p <sub>5/2</sub> )                                                                                        | 401.9   | 3.15          | N from hydrazine chloride<br>(no chlorine is detected)                                                                  |
| Atomic ratios                                                                                                                      |         |               | <i>Observations</i>                                                                                                     |
| S(SO <sub>4</sub> <sup>2-</sup> )/S(S <sup>2-</sup> )                                                                              |         | 2.58          | S(sulfate)/S(sulfide) for S 2p                                                                                          |
| S(S <sup>2-</sup> )/Mo <sub>(3d, 229.6; 232.8)</sub>                                                                               |         | 2.03          | As expected                                                                                                             |
| [S(SO <sub>4</sub> <sup>2-</sup> ) + C(CO <sub>3</sub> <sup>2-</sup> ) + O(O <sup>2-</sup> )]<br>/Mo <sub>(3d, 233.8; 236.8)</sub> |         | 3.05          | Compatible with Mo(SO <sub>4</sub> ) <sub>3</sub> , Mo(CO <sub>3</sub> ) <sub>3</sub><br>and MoO <sub>3</sub>           |
| Oxidized species / O                                                                                                               |         | 1.02          |                                                                                                                         |
| O <sub>532.1</sub> /S(SO <sub>4</sub> <sup>2-</sup> )                                                                              |         | 4.08          | As expected<br>(subtracting O=C contribution)                                                                           |

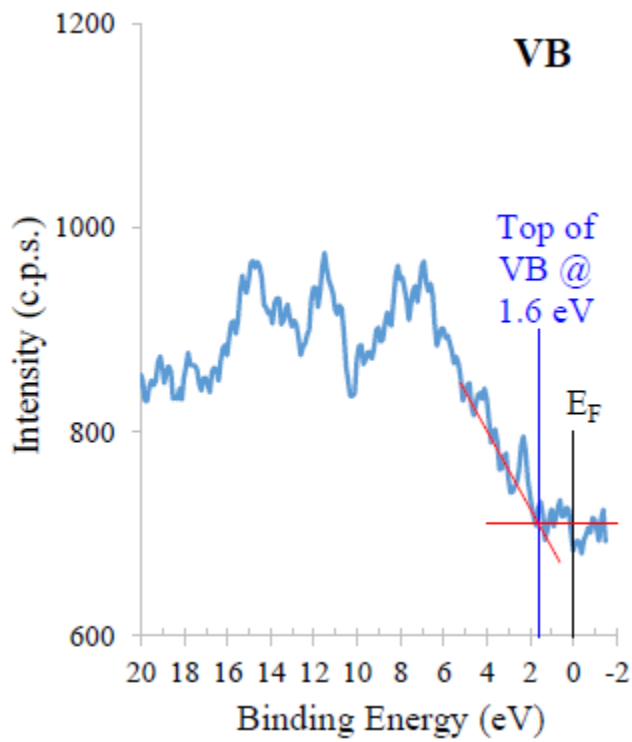

Figure S1. XPS Valence Band. The spectrum was smoothed (with a linear Savitzky-Golay function with Kernel width of 3), corrected from the charge shift, and the source satellites were subtracted.

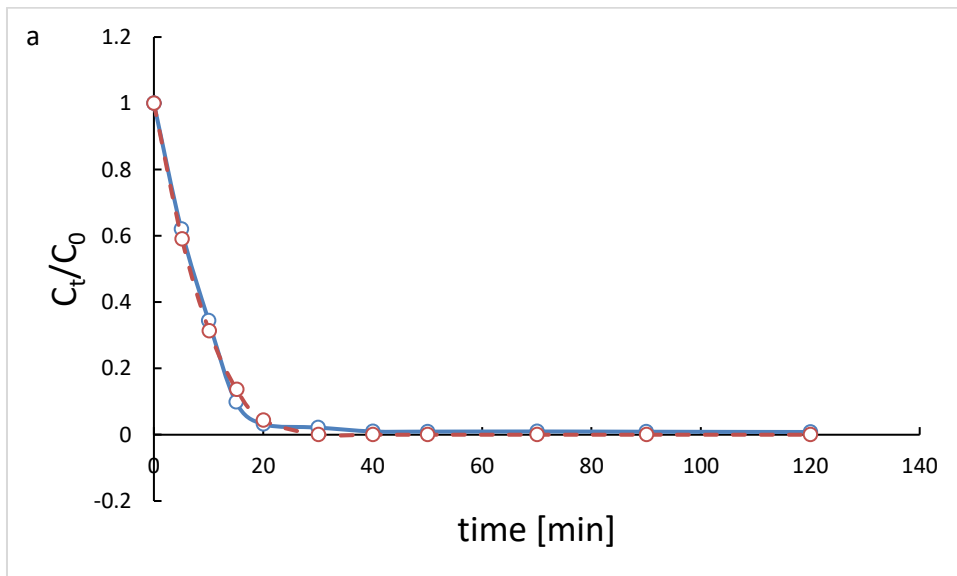

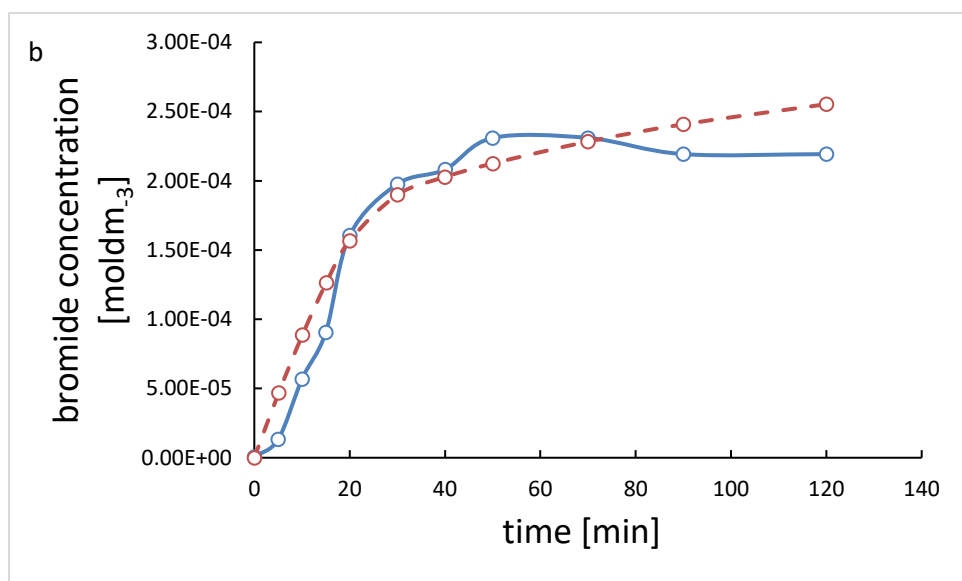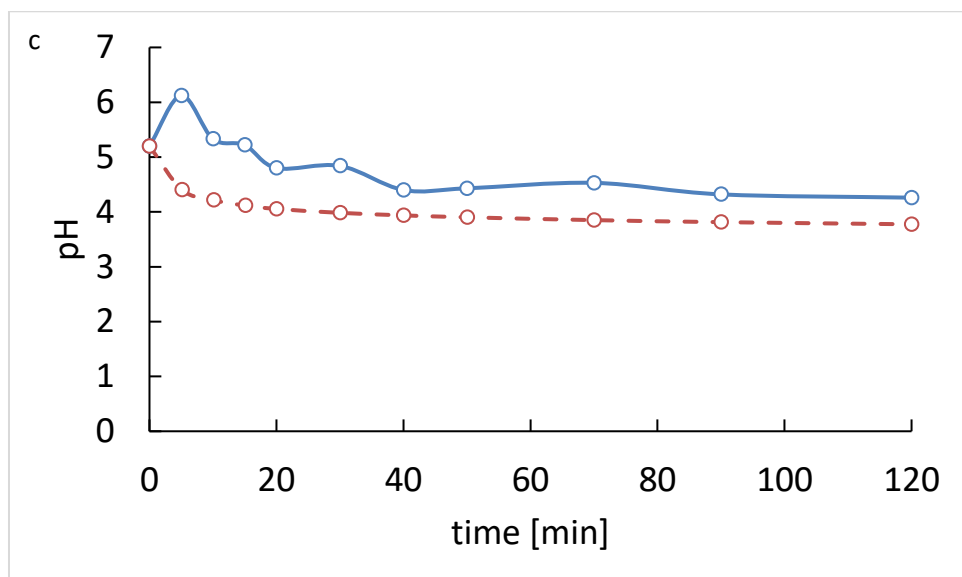

Figure S2. Comparison of the obtained and simulated results (actual results - blue, simulated results - red) of BPB decay (a), bromide production (b), pH changes of the reaction mixture (c) over time. The simulation was performed based on the proposed mechanism.

Table S2. The rate constants of reactions considered for the kinetic simulation of PFOA decomposition under ionizing radiation in N<sub>2</sub>O-saturated aqueous solutions [1,2].

| No. | Reaction                                                                                  | Rate constant<br>[dm <sup>3</sup> mol <sup>-1</sup> s <sup>-1</sup> ] |
|-----|-------------------------------------------------------------------------------------------|-----------------------------------------------------------------------|
| 1.  | $2 e_{\text{aq}}^- \rightarrow \text{H}_2 + 2 \text{OH}^-$                                | $1.1 \times 10^{10}$                                                  |
| 2.  | $e_{\text{aq}}^- + \text{H}^\bullet \rightarrow \text{H}_2 + \text{OH}^-$                 | $2.5 \times 10^{10}$                                                  |
| 3.  | $e_{\text{aq}}^- + \text{}^\bullet\text{OH} \rightarrow \text{OH}^-$                      | $3.0 \times 10^{10}$                                                  |
| 4.  | $e_{\text{aq}}^- + \text{H}^+ \rightarrow \text{H}^\bullet$                               | $2.3 \times 10^{10}$                                                  |
| 5.  | $2 \text{H}^\bullet \rightarrow \text{H}_2$                                               | $1.55 \times 10^{10}$                                                 |
| 6.  | $\text{}^\bullet\text{OH} + \text{tert-Butanol} \rightarrow \text{H}_2\text{O}$           | $6 \times 10^8$                                                       |
| 7.  | $\text{H}^\bullet + \text{tert-Butanol} \rightarrow \text{H}_2\text{O}$                   | $1 \times 10^5$                                                       |
| 8.  | $\text{H}^\bullet + \text{}^\bullet\text{OH} \rightarrow \text{H}_2\text{O}$              | $7.0 \times 10^9$                                                     |
| 9.  | $\text{H}^\bullet + \text{H}_2\text{O} \rightarrow \text{H}_2 + \text{}^\bullet\text{OH}$ | 10                                                                    |
| 10. | $\text{H}^\bullet + \text{OH}^- \rightarrow e_{\text{aq}}^- + \text{H}_2\text{O}$         | $2.2 \times 10^7$                                                     |
| 11. | $e_{\text{aq}}^- + \text{BPB} \rightarrow \text{products} + \text{Br}^-$                  | $1.1 \times 10^{10}$                                                  |
| 12. | $\text{H}^\bullet + \text{BPB} \rightarrow \text{products} + \text{Br}^-$                 | $2.9 \times 10^9$                                                     |

## References

[1] G.V. Buxton, C.L. Greenstock, W.P. Helman, A.B. Ross. 1988 *J. Phys. Chem. Ref. Data*, **17** 513-886.

[2] A.J. Elliot, A. 1989 *Radiat. Phys. Chem.* **34** 753-758.
